# Supplementary material
Source: PubMed Central journal article supplement (PMC2839501)
Supplement: NIHMS181972-supplement-suppl.pdf [file NIHMS181972-supplement-suppl.pdf]

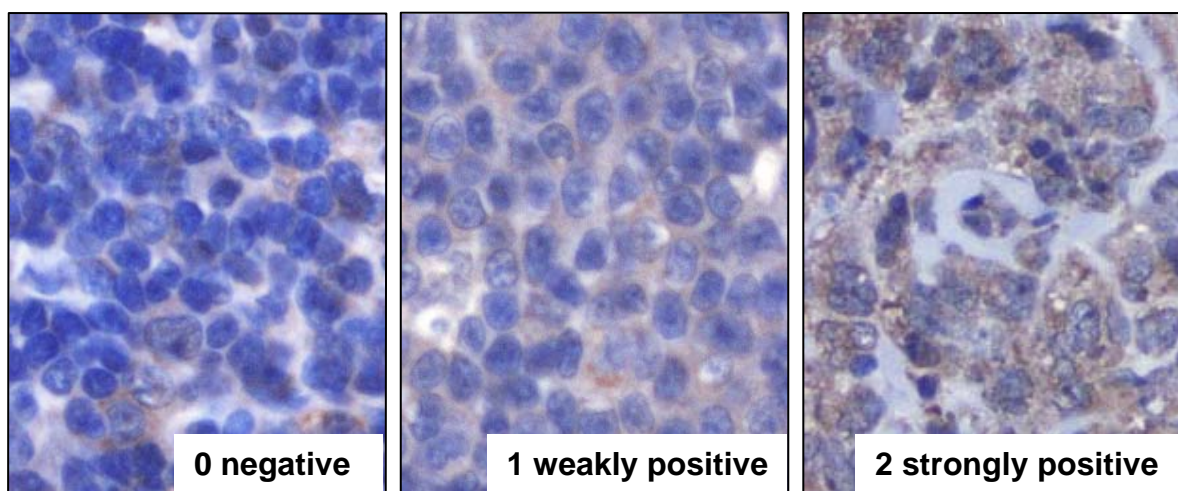

**Supplemental Figure S1. Immunohistologic Scoring**

Immunohistochemical criteria in Tissue Microarray Analysis was scored as shown above (IHC scores: 0=negative, 1=weakly positive and 2=strongly positive).

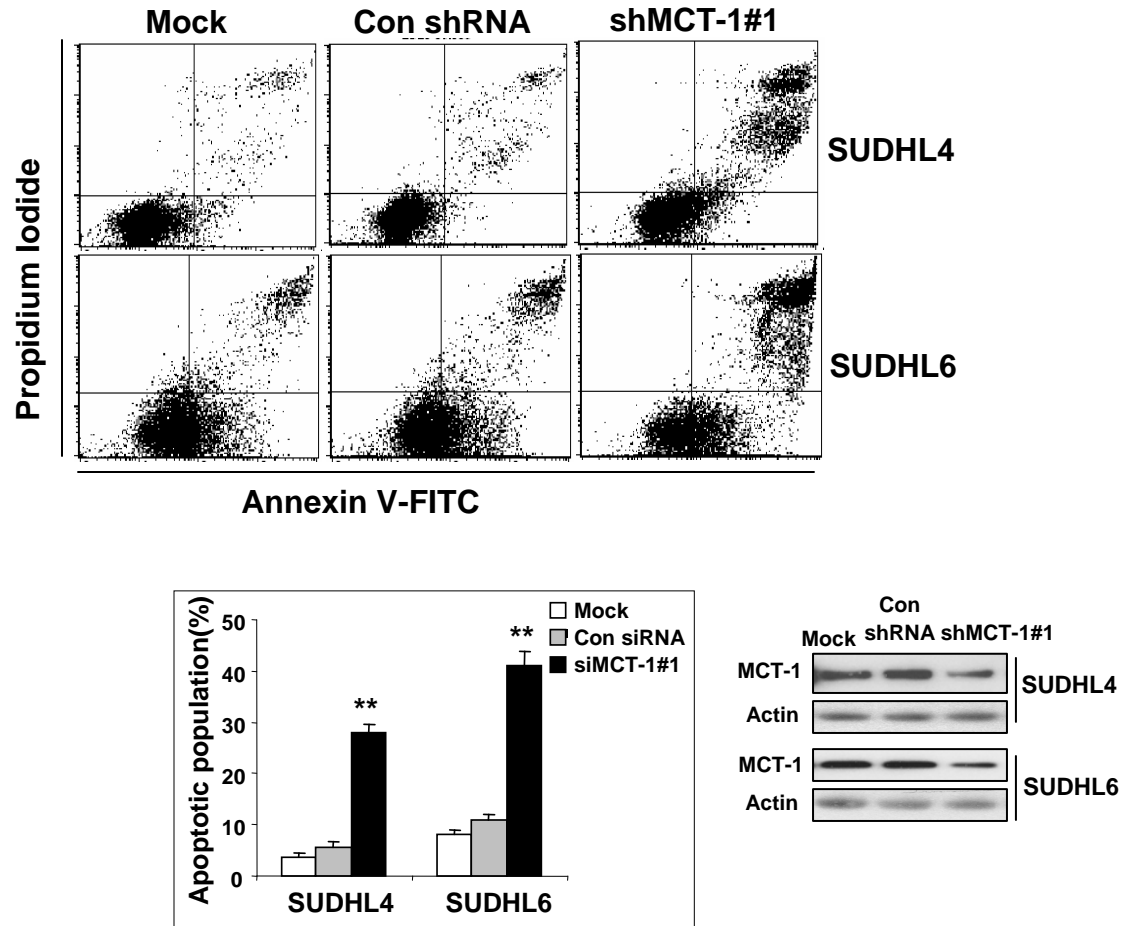

**Supplemental Figure S2.** SUDHL4 and SUDHL6 cells were transduced with a lentivirally encoded MCT-1 short hairpin RNAs (hairpin #1) (shMCT-1 #1) and control shRNA. At 72 hrs after transduction, cell apoptosis was measured via Annexin V and PI staining. Flow cytometric profile was showed in the upper panel. The data in the lower panel represents mean  $\pm$  SD of 3 independent experiments. Analysis of variance was determined by Student t test relative to control shRNA. \*\*,  $p < 0.01$ . MCT-1 protein level was monitored by immunoblotting.

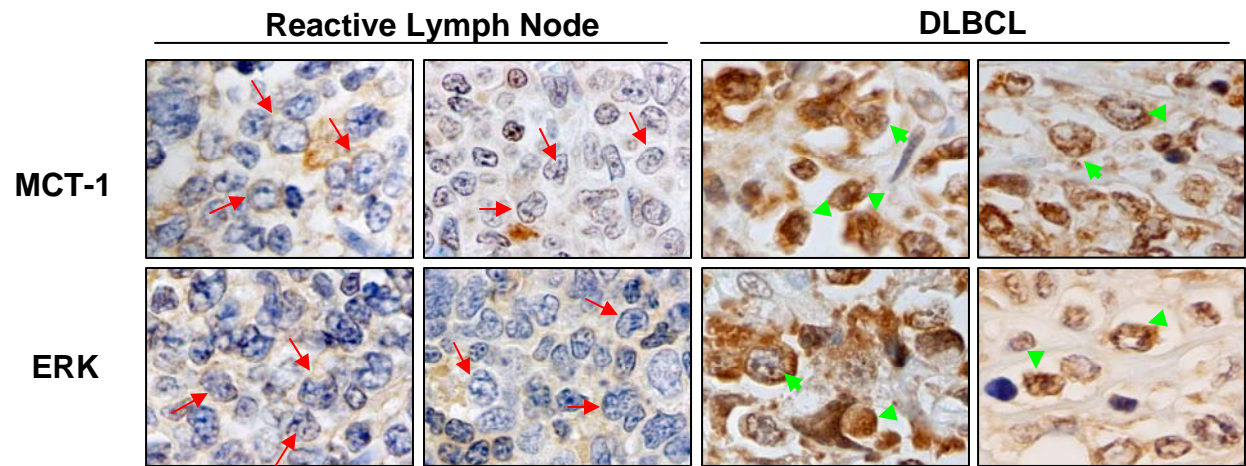

**Supplemental Figure S3.** MCT-1 and ERK1/2 expression in reactive germinal center B-cell centroblasts (arrows) and DLBCL cells (arrow heads) (IHC, original magnification, x 1000).

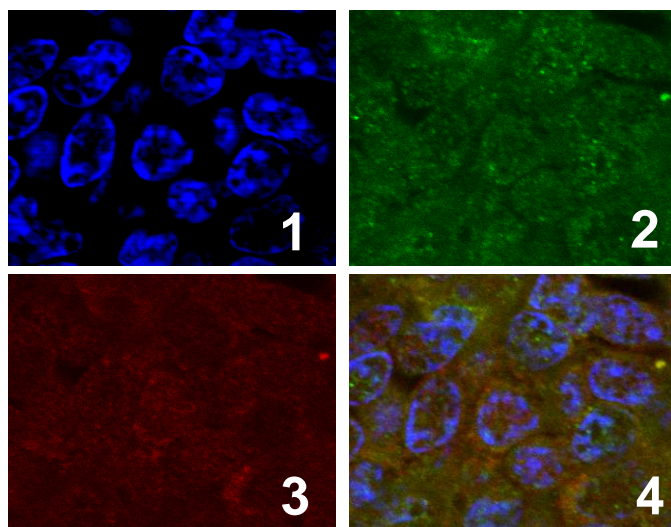

**Supplemental Figure S4. Co-localization between MCT-1 and ERK in human reactive lymph node.** Double immunofluorescent staining for MCT-1 (green) and ERK (red) indicates that there is weak overlapping in both the nucleus and the cytoplasm of human reactive lymph node. Panels 1, DAPI; 2, MCT-1; 3, ERK; and 4, Merged of MCT-1, ERK and DAPI. Magnification, x 600.
